# Supplementary material
Source: PubMed Central journal article supplement (PMC6538314)

Supplemental Figure 1

Full unedited gel  
for Figure 1B

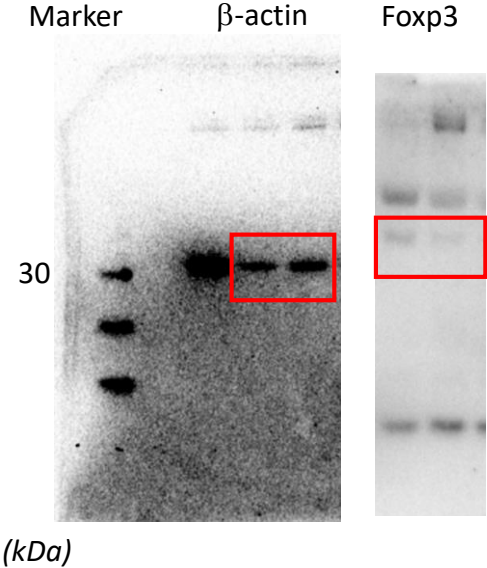

Full unedited gel  
for Figure 2E

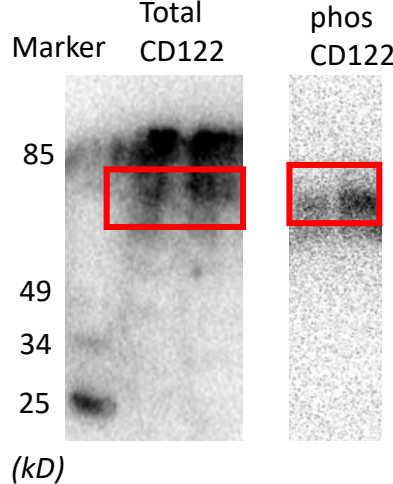

# Supplemental Figure 2

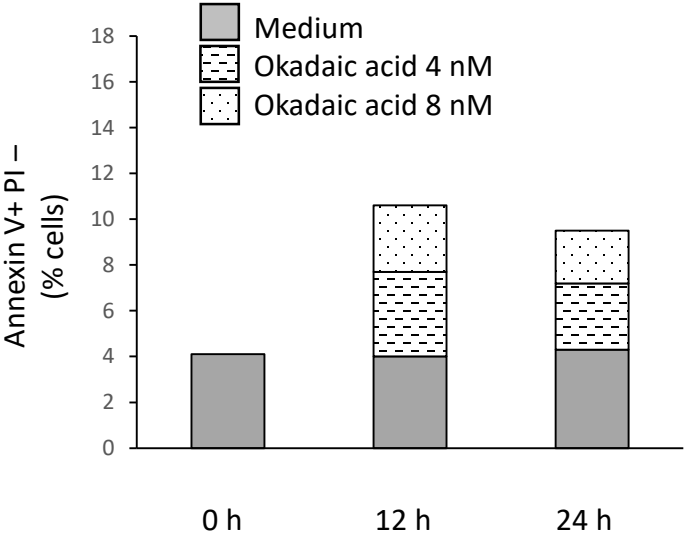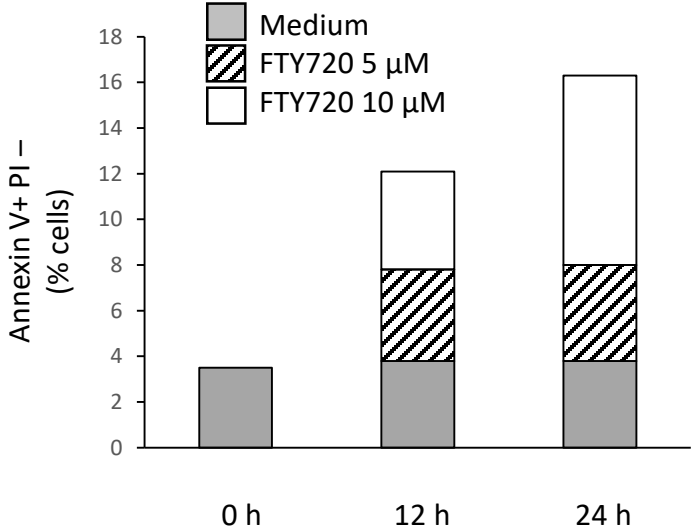

Supplement: jciinsight-4-126294-s032.pdf [file jciinsight-4-126294-s032.pdf]
